# Supplementary material for: Nicotine potentiation of brain stimulation reward : an analysis of repeated treatments
Source: Royal Society of Chemistry journal article supplement (doi:10.1039/d1na00013f), 1991-01-01
Supplement: d1na00013f1.pdf [file d1na00013f1.pdf]

## Supplemental

### **Polarisation tunable piezo-catalytic activity of Nb-doped PZT with low Curie temperature for efficient H<sub>2</sub> generation and CO<sub>2</sub> reduction**

Yan Zhang<sup>1,\*</sup>, Pham Thi Thuy Phuong<sup>2,3,\*,#</sup>, Nguyen Phuc Hoang Duy<sup>2</sup>, Eleanor Roake<sup>4</sup>,  
Hamideh Khanbareh<sup>4</sup>, Margaret Hopkins<sup>4</sup>, Xuefan Zhou<sup>1</sup>, Dou Zhang<sup>1</sup>, Chris Bowen<sup>4,#</sup>

*1 State Key Laboratory of Powder Metallurgy, Central South University, Hunan, 410083, China*

*2 Institute of Chemical Technology, Vietnam Academy of Science and Technology, TL29 Street, Thanh Loc Ward, District 12, HCM City, Vietnam*

*3 Graduate University of Science and Technology, Vietnam Academy of Science and Technology, 18 Hoang Quoc Viet Street, Cau Giay District, Hanoi, Vietnam*

*4 Department of Mechanical Engineering, University of Bath, Bath BA2 7AY, UK*

\* Those authors contributed equally.

# Corresponding authors: [pttphuong@ict.vast.vn](mailto:pttphuong@ict.vast.vn); [c.r.bowen@bath.ac.uk](mailto:c.r.bowen@bath.ac.uk)

(A)

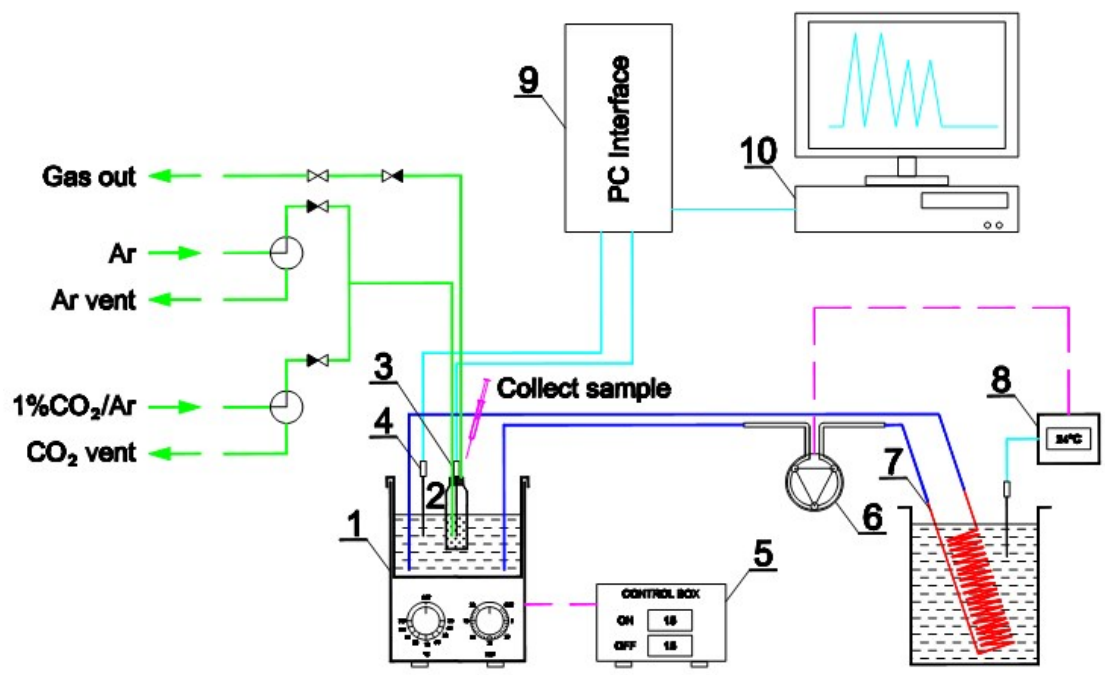

(B)

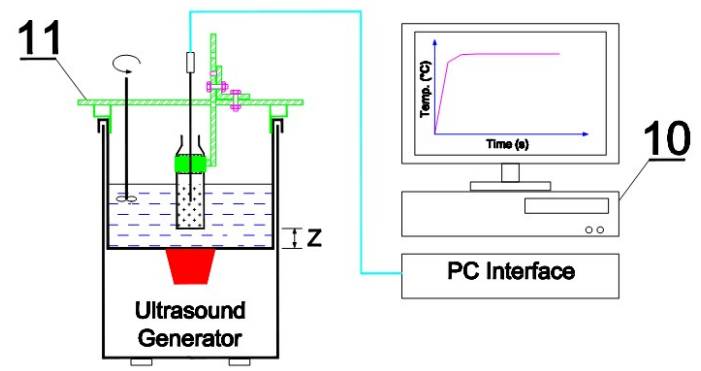

**Figure S1.** (A) Complete experimental setup for piezo-catalysis based on double-bath-type sonoreactor, and (B) experimental setup for calorimetric measurement.

- 1 - Ultrasonic bath; 2 – Reactor vial; 3 – Inside thermocouple; 4 – Outside thermocouple; 5 – Timer controller; 6 – Peristaltic pump; 7 – Cooling coil; 8 – Cooling bath thermocouple; 9 – Interface; 10 – Computer; 11 – Specific cover

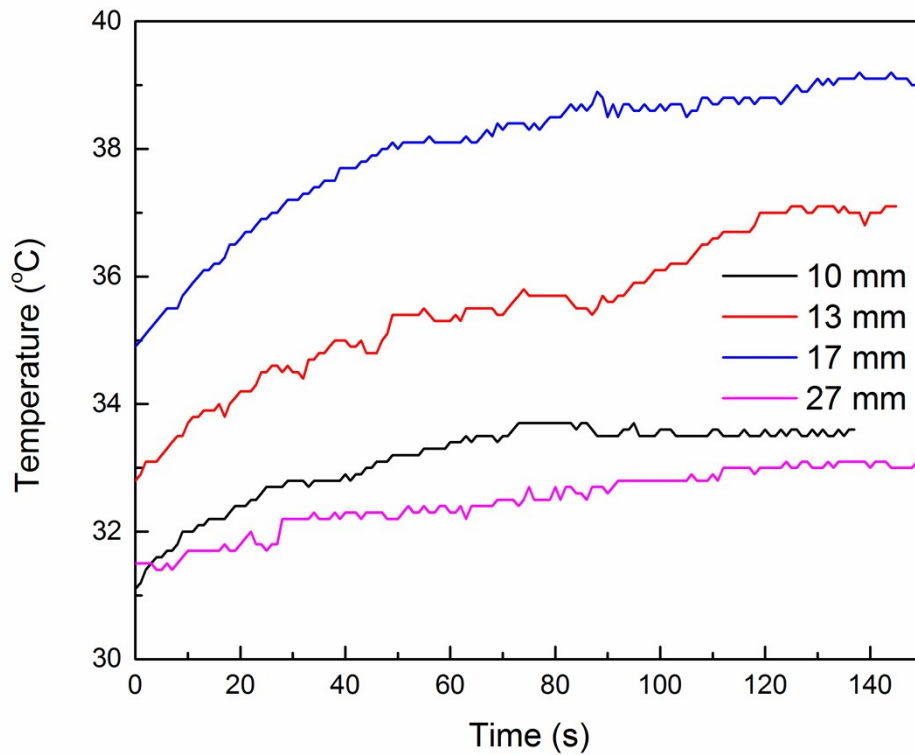

**Figure S2.** Temperature profiles of calorimetric measurements at different height locations of  $z = 10, 13, 17,$  and  $27$  mm, as indicated in Figure S1(B).

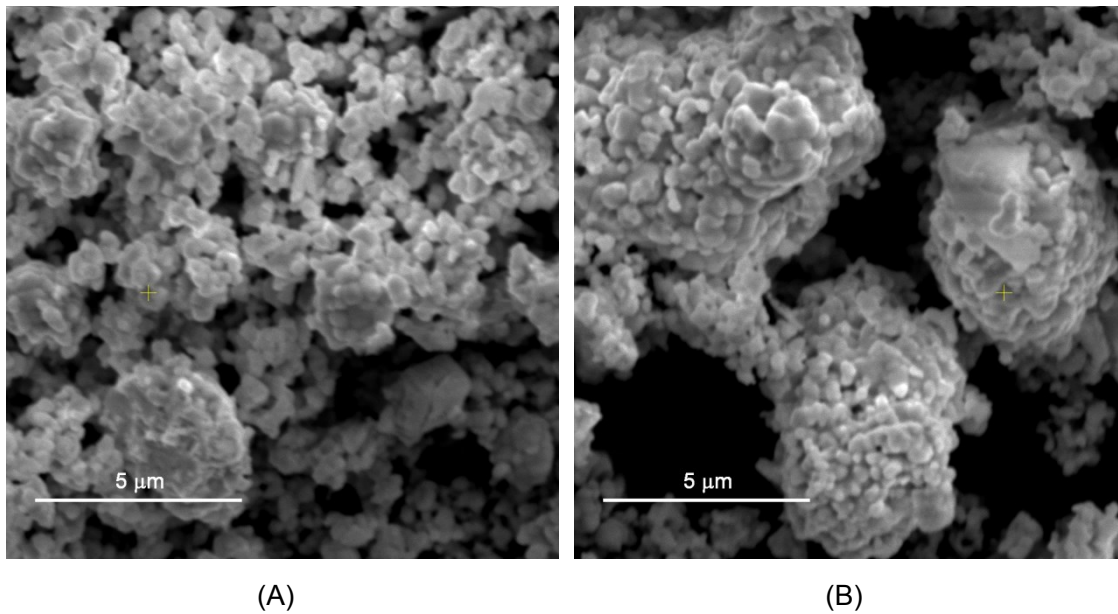

**Figure S3.** SEM images of the used PZTN powders at dosage of (A)  $0.1$  g/L. and (B)  $1.0$  g/L

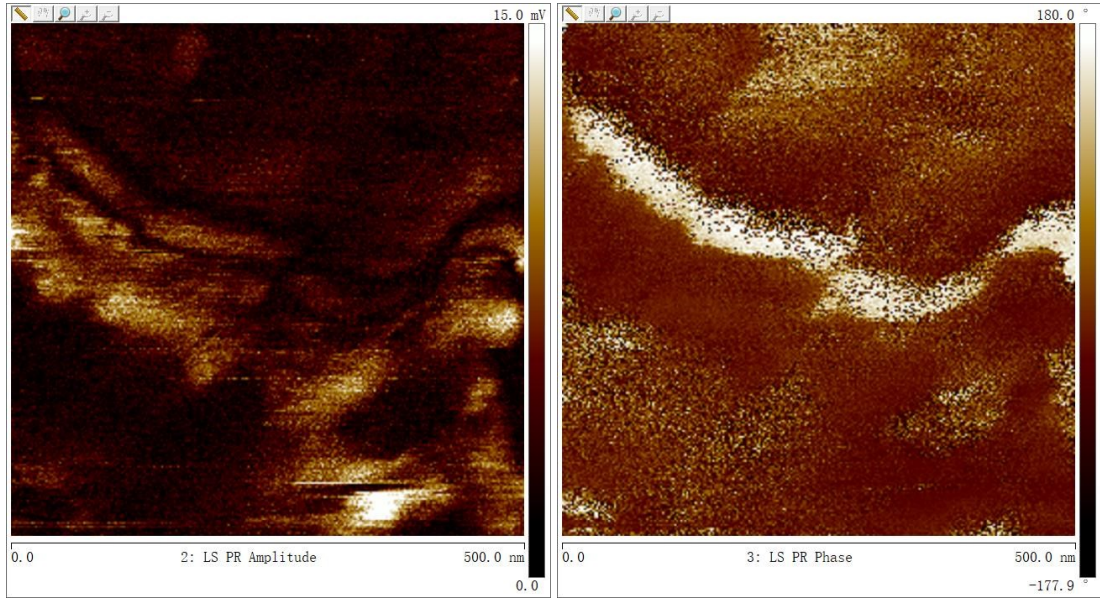

Figure S4. PFM images of PZTN powders. (A) 2D Amplitude image, (B) PFM phase image.

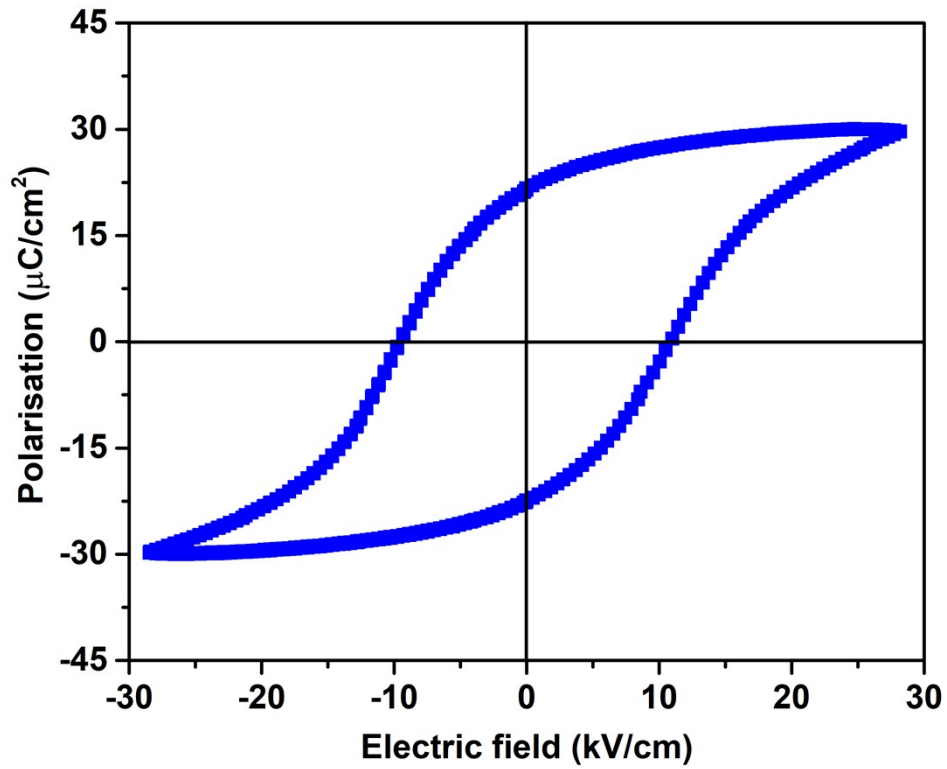

Figure S5. Room-temperature P-E hysteresis loop of the unpoled dense PZTN disk.

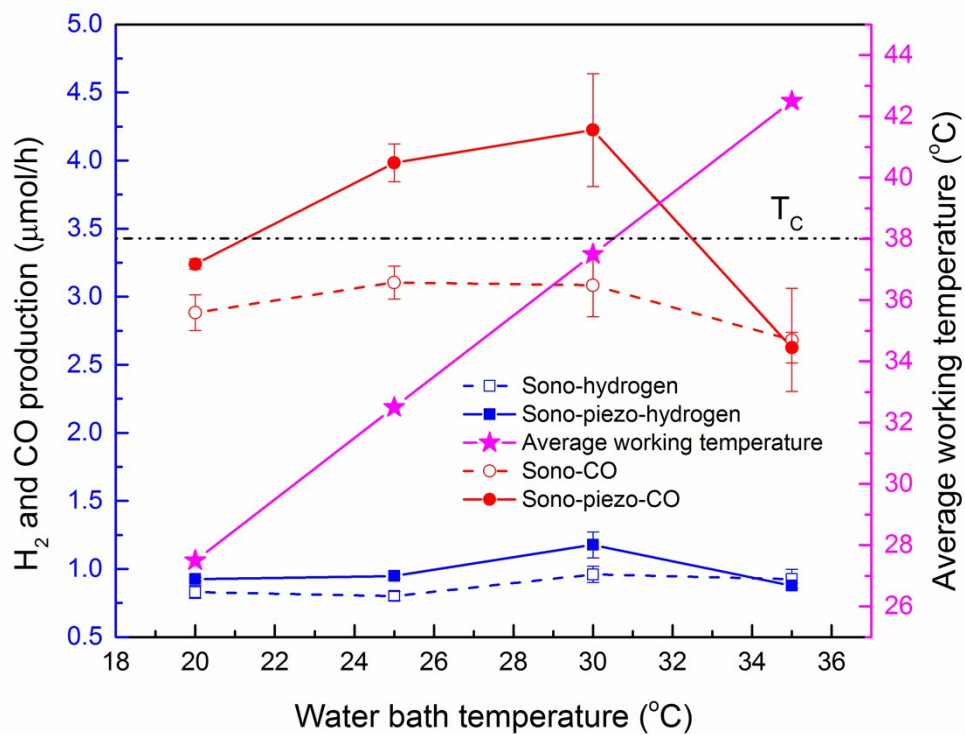

**Figure S6.** Effect of water bath temperature on the hydrogen and CO production rate (catalyst dosage 0.1g/L ,  $t_{\text{react}} = 30$  min)
